# Supplementary material for: Severe liver damage, low bone mineral content, and PDXDC1/TTC39B gene variations linked to NAFLD with metabolic syndrome
Source: bioRxiv or medRxiv preprint supplement (doi:10.1101/2023.05.11.23289665), 2023-05-11
Supplement: Supplementary file [file media-1.pdf]

**A**

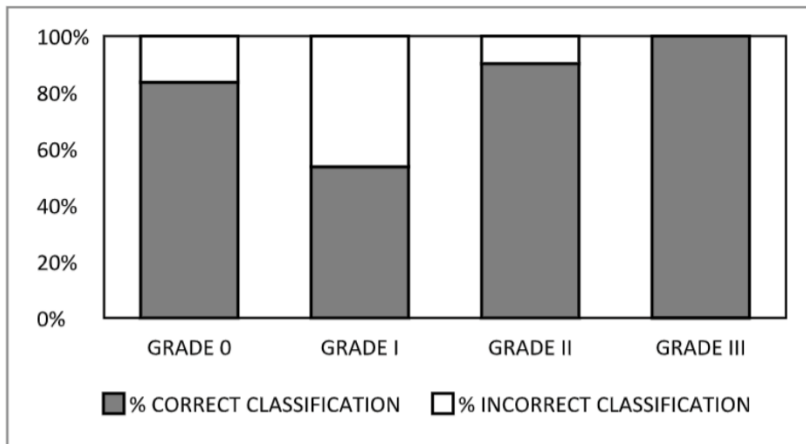

**B**

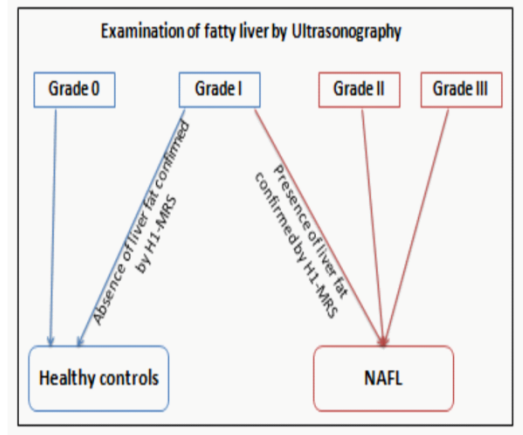

**C**

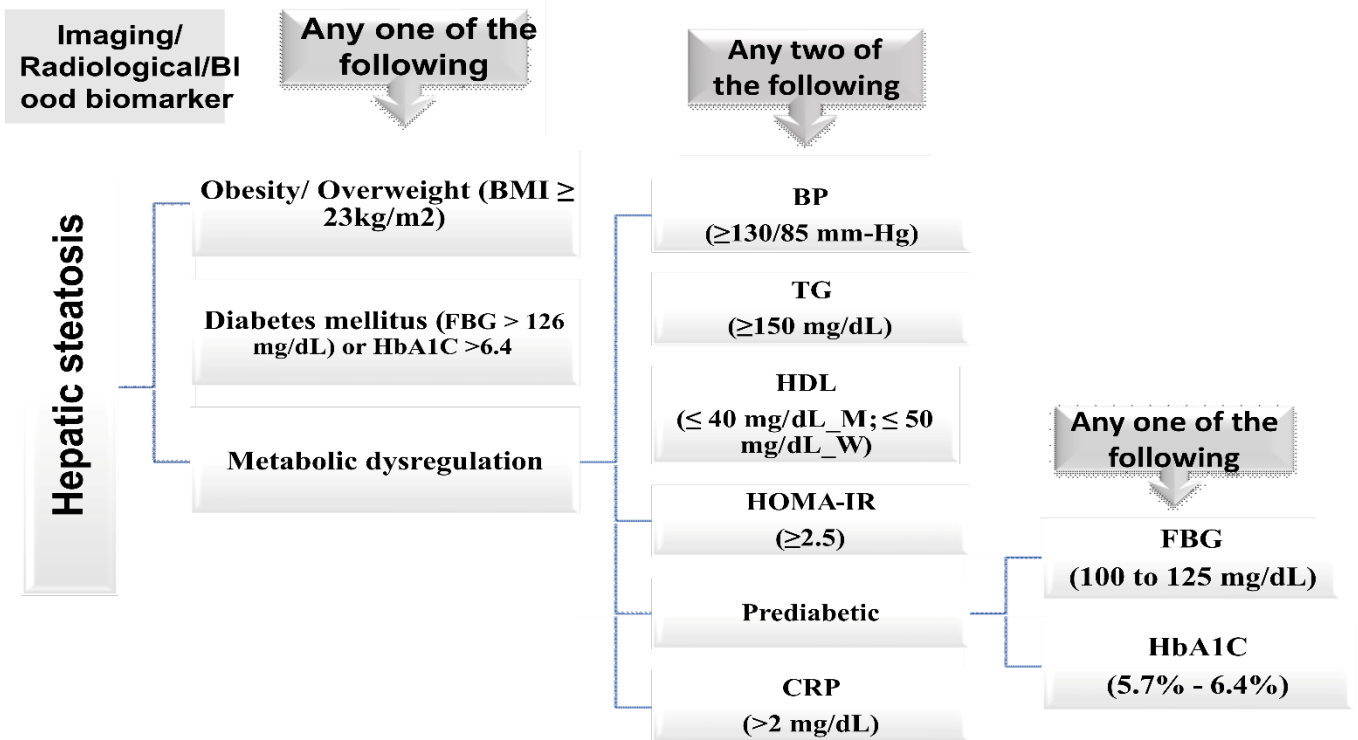

**Supplementary figure 1:**

A) Concordance of diagnosis of fatty liver performed by both MRS and ultrasonography; B) Diagnostic definitions of healthy and fatty liver patients, followed in our study; C) Diagnostic definition of Group4 FLD+/MeS+

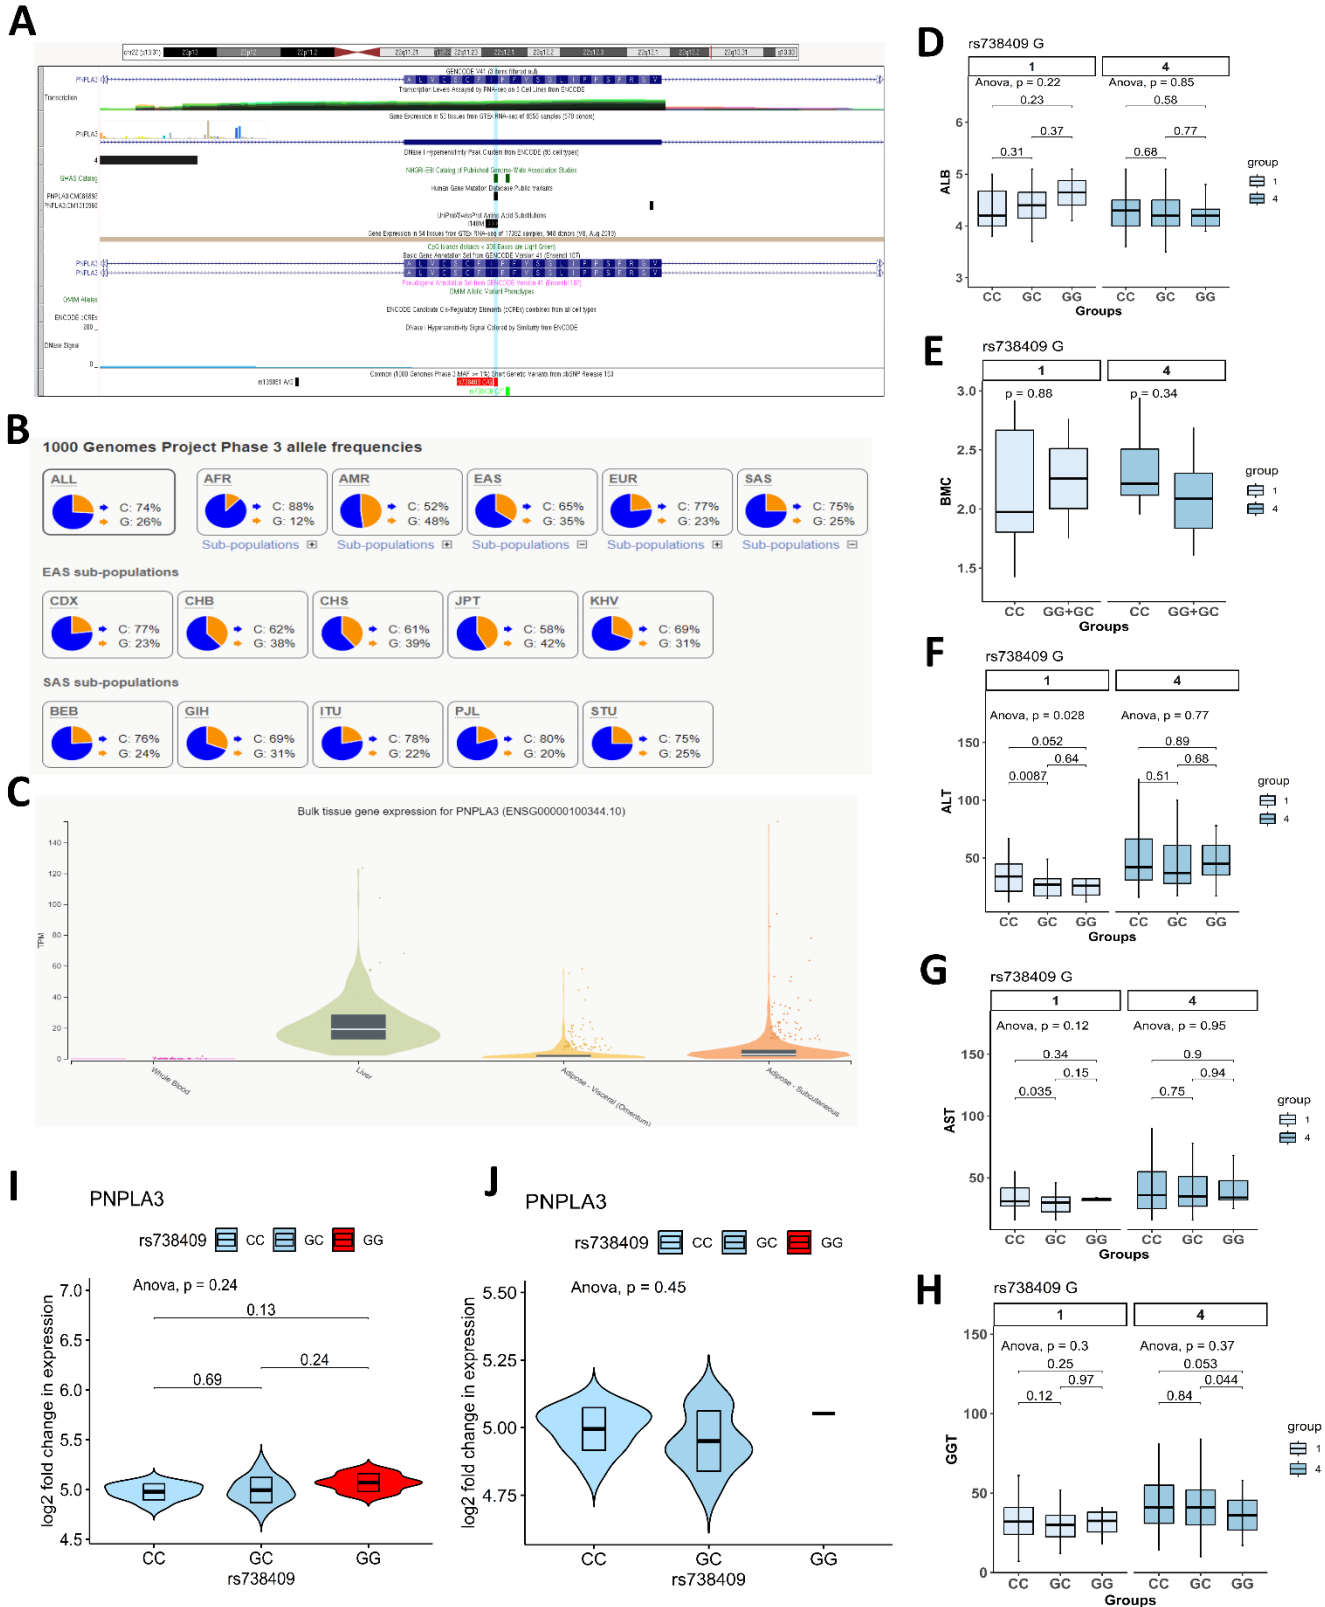

**Supplementary figure 2: Details of rs738409**

A) Genomic annotation of rs738409 in PNPLA3 gene from dbSNP Short Genetic Variations (hg19); B) 1000 Genomes Project Phase 3 allele frequencies from ensembl.org; C) Gene expression from GTEx portal for five different tissue types – adipose, skeletal and liver; D-H) Distribution of liver damage markers and bone mineral content among different genotypes; I- J) violin plots showing the effects of eQTL on PNPLA3 gene expression in our study cohort.

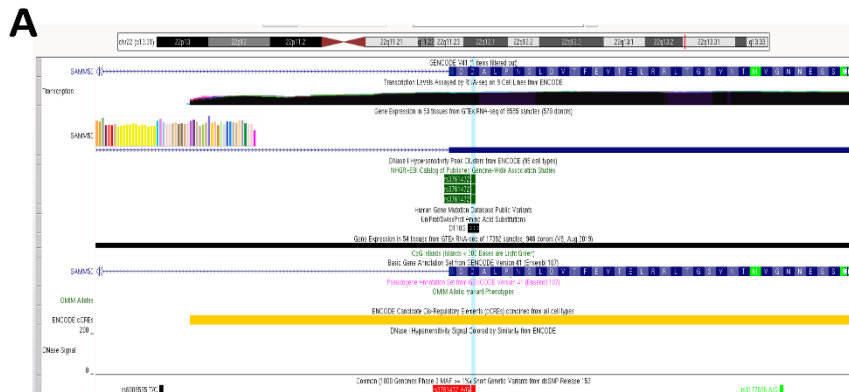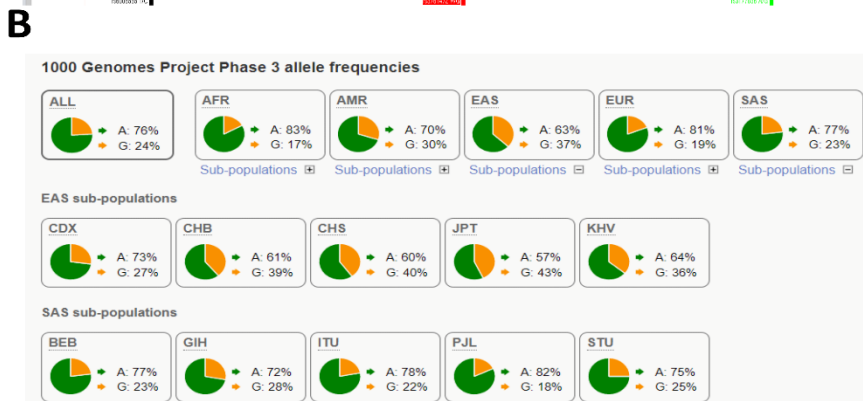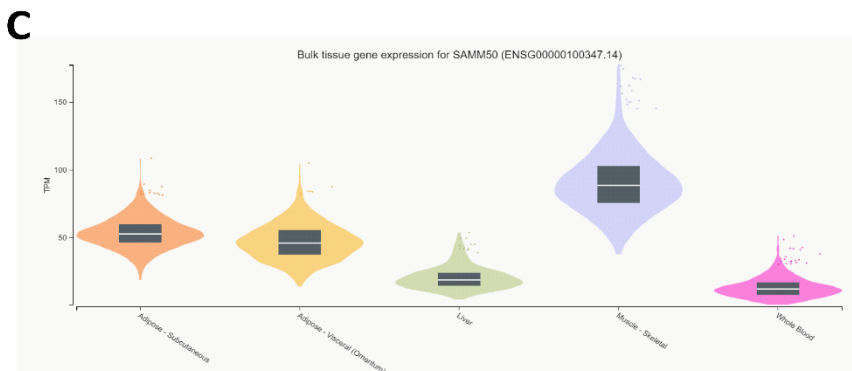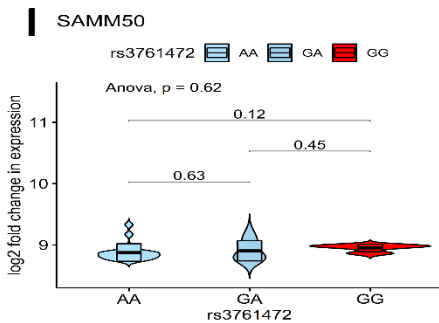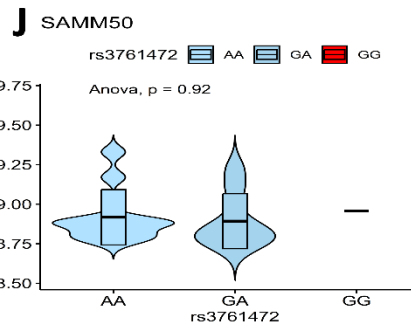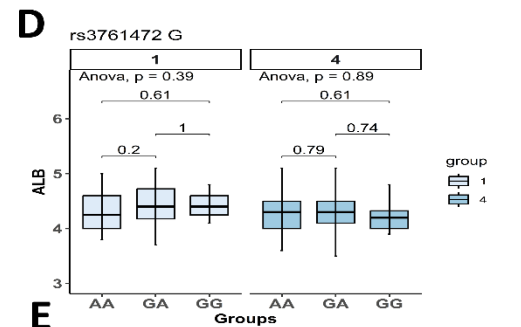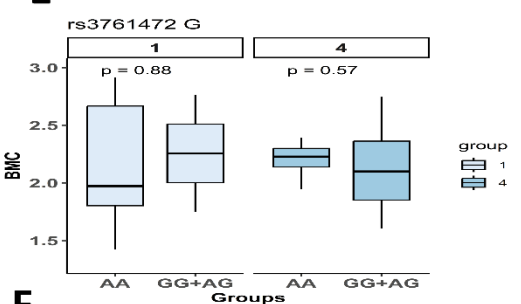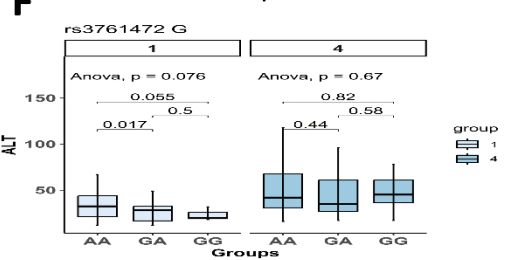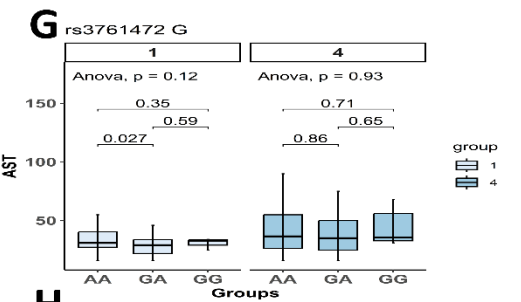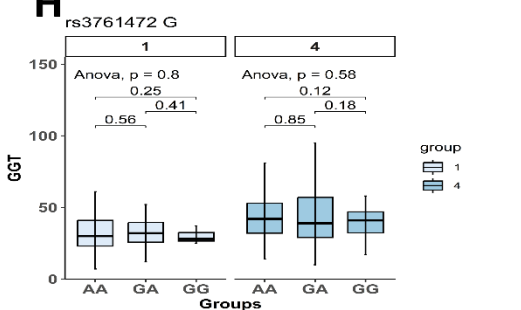

**Supplementary figure 3: Details of rs3761472**

A) Genomic annotation of rs3761472 in SAMM50 gene from dbSNP Short Genetic Variations (hg19) ; B) 1000 Genomes Project Phase 3 allele frequencies from ensembl.org ; C) Gene expression from GTEx portal for five different tissue types – adipose, skeletal and liver ; D-H) Distribution of liver damage markers and bone mineral content among different genotypes ; I- J) violin plots showing the effects of eQTL on SAMM50 gene expression in our study cohort.

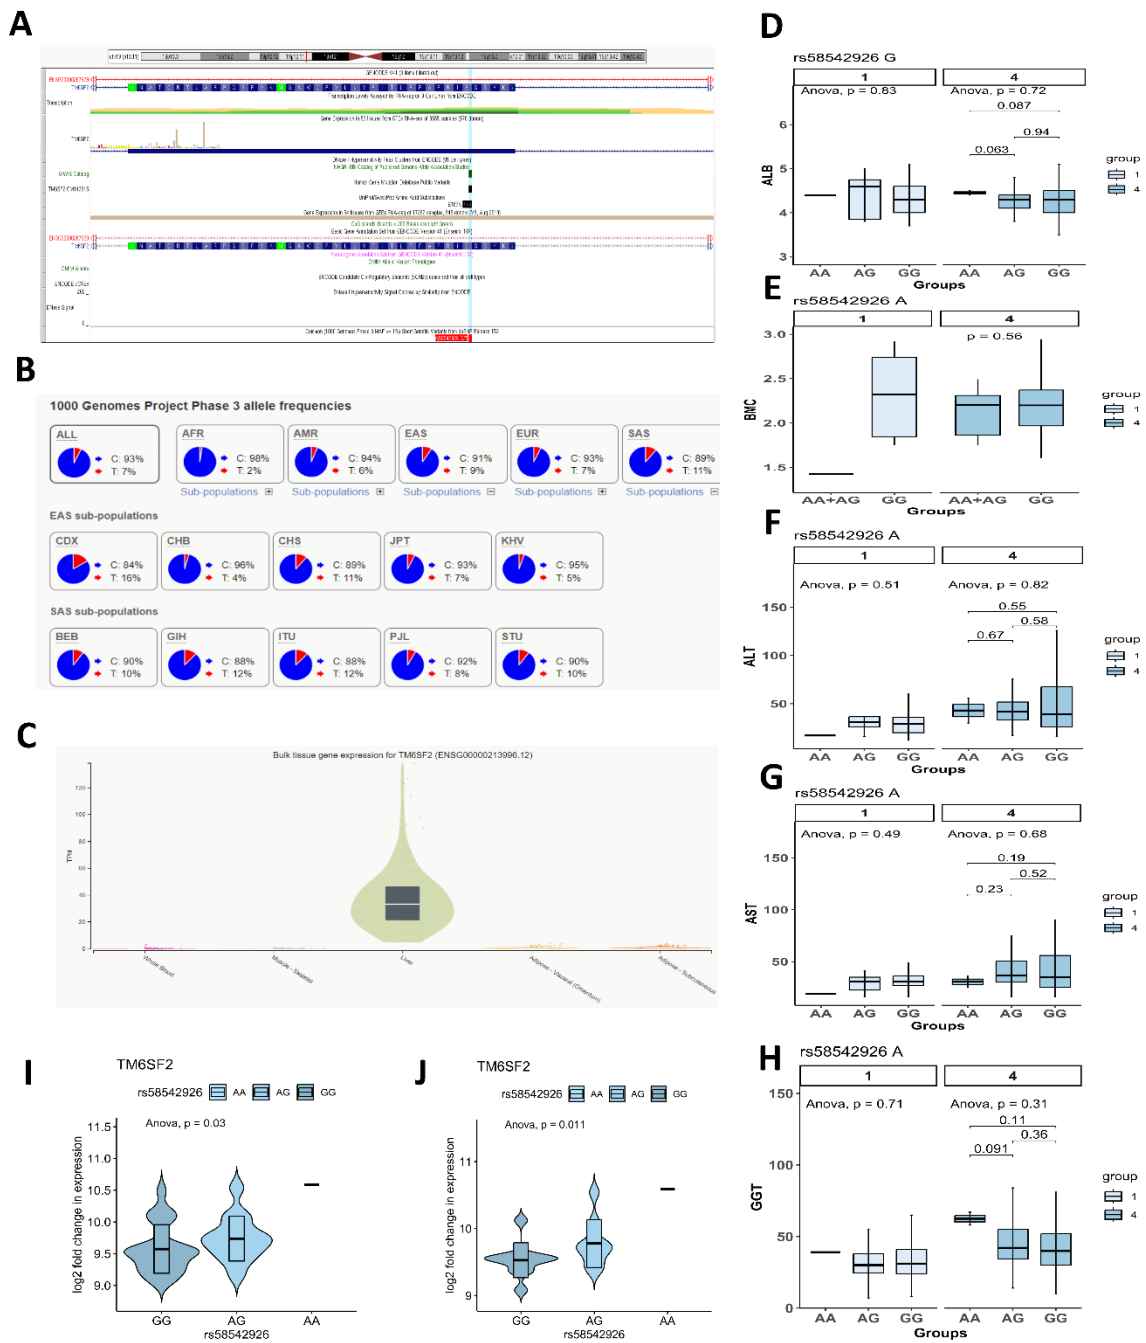

#### Supplementary figure 4: Details of rs58542926

A) Genomic annotation of rs58542926 in TM6SF2 gene from dbSNP Short Genetic Variations (hg19) ; B) 1000 Genomes Project Phase 3 allele frequencies from ensembl.org ;C) Gene expression from GTEx portal for five different tissue types – adipose, skeletal and liver; D-H) Distribution of liver damage markers and bone mineral content among different genotypes ;I- J) violin plots showing the effects of eQTL on TM6SF2 gene expression in our study cohort.

| <b>Supplementary Table 1: Comparison of clinicopathological parametrs between fatty liver individuals and without fatty liver individuals</b> |                                       |                     |                     |                 |
|-----------------------------------------------------------------------------------------------------------------------------------------------|---------------------------------------|---------------------|---------------------|-----------------|
|                                                                                                                                               | <b>Parameters (unit)</b>              | <b>FAT+ (n=260)</b> | <b>FAT- (n=291)</b> | <b>p-value</b>  |
|                                                                                                                                               | <b>Age (Years)</b>                    | 41.46±10.45         | 42.11±12.36         | 5.80E-01        |
|                                                                                                                                               | <b>MALE:FEMALE</b>                    | 125:135             | 163:128             |                 |
| Anthropometry                                                                                                                                 | <b>Weight(Kg)</b>                     | 66.87±9.95          | 58.2±11.48          | 7.29E-20        |
|                                                                                                                                               | <b>BMI (Kg/m2)</b>                    | 26.97±3.85          | 23.13±4.3           | 5.95E-26        |
|                                                                                                                                               | <b>HC (cm)</b>                        | 100.34±8.53         | 94.71±7.76          | 4.49E-12        |
|                                                                                                                                               | <b>Waist circumference(cm)</b>        | 93.2±8.6            | 84.13±11.3          | 1.66E-24        |
| Diabetes                                                                                                                                      | <b>FBG (mg/dL)</b>                    | 96.08±36.13         | 85.81±19.83         | 0.00E+00        |
|                                                                                                                                               | <b>Hba1c (mg/dL)</b>                  | 6.19±1.52           | 5.54±0.86           | 0.00E+00        |
|                                                                                                                                               | <b>Fasting Insulin (IU/mL)</b>        | 9.05±6.5            | 6.98±6.21           | 1.00E-03        |
|                                                                                                                                               | <b>HOMAIR</b>                         | 2.24±2.48           | 1.58±2.46           | 7.00E-03        |
| Liver damage marker                                                                                                                           | <b>ALT (IU/l)</b>                     | 54.25±38.83"        | 34.05±21.07         | 0.00E+00        |
|                                                                                                                                               | <b>AST (IU/l)</b>                     | 43.58±26.69         | 31.24±11.51         | 0.00E+00        |
|                                                                                                                                               | <b>GGT (IU/l)</b>                     | 46.6±29.08          | 37.09±21.67         | 2.24E-05        |
| Lipid level                                                                                                                                   | <b>Triglyceride (mg/dL)</b>           | 165.11±96.05        | 144.54±88.73        | 9.87E-03        |
|                                                                                                                                               | <b>Total cholesterol (mg/dL)</b>      | 183.33±43.58        | 169.74±41.36        | 2.20E-04        |
|                                                                                                                                               | <b>HDL (mg/dL)</b>                    | 39.13±9.2           | 42.43±11.63         | 2.40E-04        |
|                                                                                                                                               | <b>LDL (mg/dL)</b>                    | 111.73±41.45        | 97.77±38.59         | 6.25E-05        |
|                                                                                                                                               | <b>VLDL (mg/dL)</b>                   | 31.47±13.08         | 27.68±11.67         | 4.53E-04        |
|                                                                                                                                               | <b>% with metabolic dysregulation</b> | 80.99               | 57.88               |                 |
| Non-invasive Fibrosis marker                                                                                                                  | <b>LSM (kPa)</b>                      | 6.45±3.2            | 5.25±3.63           | 1.81E-04        |
| Inflammation marker                                                                                                                           | <b>CRP (mg/dL)</b>                    | 4.9±3.81            | 3.7±3.29            | 8.95E-04        |
| Blood pressure                                                                                                                                | <b>SBP (mmHg)</b>                     | 126.11±17.13        | 124.7±18.67         | 3.60E-01        |
|                                                                                                                                               | <b>DBP (mmHg)</b>                     | 80.36±11.16         | 77.97±11.52         | 1.53E-02        |
|                                                                                                                                               | <b>Urea (mh/dL)</b>                   | 18.52 ± 6.22        | 18.65 ± 6.23        | 2.40E-01        |
|                                                                                                                                               | <b>Creatinine (mg/dL)</b>             | 0.97±0.17           | 0.98±0.19           | 6.10E-01        |
|                                                                                                                                               | <b>SS(mm)</b>                         | 2.95±1.82           | 2.11±2.06           | 5.39E-07        |
|                                                                                                                                               | <b>BSP(mm)</b>                        | 1.29±1.06           | 0.88±0.64           | <b>1.17E-07</b> |
|                                                                                                                                               | <b>TSP(mm)</b>                        | 1.9±1.45            | 1.36±1.08           | 1.88E-06        |
|                                                                                                                                               | <b>NU(mm)</b>                         | 2.14±1.37           | 1.69±1.22           | 7.71E-05        |
|                                                                                                                                               | <b>SFT(mm)</b>                        | 8.24±5.37           | 6.05±4.51           | 3.71E-07        |

**Suppl. Table 1:**

Comparison of clinicopathological parameters between fatty liver individuals and without fatty liver individuals

| Supplementary Table 2: Characteristics of body fat and muscle composition among the study groups |                |                |                |               |                                   |           |                |                 |                   |                   |         |
|--------------------------------------------------------------------------------------------------|----------------|----------------|----------------|---------------|-----------------------------------|-----------|----------------|-----------------|-------------------|-------------------|---------|
| parameters (Units)                                                                               | Total (n=112)  |                |                |               | p-value (adjusted for covariates) | Non-obese |                |                 |                   | Obese             |         |
|                                                                                                  | Group 4 (n=60) | Group 3 (n=14) | Group 2 (n=31) | Group 1 (n=7) |                                   | p-value   | Group 4        | Group 3         | Group 4           | Group 3           | p-value |
| <b>TBF.DEXA.PC</b>                                                                               | 49.06±18.47    | 39.84±14.83    | 41.05±14.28    | 38.41±11.91   | <b>0.055</b>                      | 1.04E-06  | 32.23±8.1<br>6 | 29.74±3.7<br>1  | 54.67±17.7<br>53  | 45.46±15.84<br>84 | 0.143   |
| <b>Android.fat</b>                                                                               | 58.59±17.12    | 50.9±13.71     | 51.38±14.17    | 49.14±12.96   | <b>0.091</b>                      | 3.69E-05  | 44.49±8.3<br>8 | 42.18±5.4<br>9  | 63.4±16.7<br>2    | 55.74±14.71<br>71 | 0.189   |
| <b>Gynoid.fat</b>                                                                                | 52.54±20.11    | 42.27±13.85    | 43.78±15.6     | 43.94±11.21   | <b>0.068</b>                      | 1.19E-06  | 34.47±8.4<br>5 | 33.68±3.5<br>1  | 58.7±19.2<br>2    | 47.04±15.28<br>28 | 0.067   |
| <b>TISSUE.MASS</b>                                                                               | 66.6±10.89     | 65.79±9.04     | 62.13±8.38     | 54.3±9.8      | <b>0.0</b>                        | 1.973e-10 | 56.82±7.5<br>2 | 58.49±5.4<br>6  | 69.94±9.8<br>4    | 69.84±8.1<br>3    | 0.976   |
| <b>FAT.MASS</b>                                                                                  | 33.74±16.32    | 26.74±12.22    | 26.44±11.43    | 20.48±5.63    | <b>0.021</b>                      | 1.2e-06   | 18.39±5.2<br>6 | 17.38±2.6<br>9  | 38.85±15.53<br>53 | 31.93±12.4<br>4   | 0.167   |
| <b>LEAN.MASS</b>                                                                                 | 32.9±11.34     | 39.05±9.57     | 36.24±9.02     | 33.82±10.33   | 0.190                             | 5.34E-04  | 38.43±6.2<br>6 | 41.11±4.6<br>7  | 31.01±12.37<br>1  | 37.91±11.57<br>57 | 0.132   |
| <b>FAT.FREE.MASS</b>                                                                             | 34.87±11.95    | 41.52±10.12    | 38.4±9.48      | 35.98±10.84   | 0.176                             | 5.88E-04  | 40.72±6.5<br>3 | 43.77±4.8<br>7  | 32.87±12.4<br>76  | 40.27±12.24<br>24 | 0.127   |
| <b>BMC</b>                                                                                       | 1.97±0.68      | 2.47±0.66      | 2.16±0.52      | 2.19±0.59     | <b>0.055</b>                      | 0.006208  | 2.29±0.34<br>2 | 2.67±0.34<br>34 | 1.86±0.73<br>2    | 2.36±0.78<br>78   | 0.101   |

Suppl. Table 2:

Characteristics of body fat and muscle composition among the study groups

Supplementary table 3: Details of the associated SNPs

| 1000 Genome                 |         |     |          |         |             |                           |         |                        |                  |         |         |         |         |         |            |          |             |          |
|-----------------------------|---------|-----|----------|---------|-------------|---------------------------|---------|------------------------|------------------|---------|---------|---------|---------|---------|------------|----------|-------------|----------|
| Risk allele frequency (MAF) |         |     |          |         |             |                           |         |                        |                  |         |         |         |         |         |            |          |             |          |
|                             |         |     |          |         |             |                           |         |                        |                  |         |         |         |         |         |            |          |             |          |
| SNP                         | Gene    | CHR | BP       | Alleles | Risk allele | Type of nucleotide change | p-value | OR                     | R <sub>s</sub> D | Group 1 | Group 2 | Group 3 | Group 4 | African | East Asian | Europe   | South Asian | American |
| rs471364                    | TTC398  | 9   | 15289578 | [T/C]   | G           | Silent                    | 0.001   | 3.076 [2.0;rs471364]   |                  | 0.284   | 0.21    | 0.205   | 0.205   | 0.358   | C=0.2179   | C=0.1044 | C=0.1044    | C=0.102  |
| rs2281135                   | PNPLA3  | 22  | 44332570 | [A/G]   | A           | Silent                    | 0.001   | 2.911 [2.0;rs2281135]  |                  | 0.266   | 0.355   | 0.393   | 0.393   | 0.25    | A=0.1392   | A=0.1988 | A=0.239     | A=0.435  |
| rs7200543                   | PDXDC1  | 16  | 15129970 | [A/G]   | A           | Synonymous_L              | 0.031   | 2.26 [1.08;rs7200543]  |                  | 0.416   | 0.387   | 0.442   | 0.442   | 0.473   | G=0.1846   | G=0.3710 | G=0.3062    | G=0.442  |
| rs3761472                   | SAMM50  | 22  | 44368122 | [A/G]   | G           | Missense_D110             | 0.002   | 2.863 [2.0;rs3761472]  |                  | 0.302   | 0.484   | 0.478   | 0.478   | 0.176   | G=0.1710   | G=0.3710 | G=0.1879    | G=0.297  |
| rs10067427                  |         | 5   | 99342047 | [A/G]   | G           |                           | 0.003   | 0.8541 [0.1;rs1006742] |                  | 0.159   | 0.032   | 0.013   | 0.013   | 0.196   | A=0.2950   | A=0.7440 | A=0.6173    | A=0.674  |
| rs738409                    | PNPLA3  | 22  | 44324727 | [C/G]   | G           | Missense_148A             | 0.003   | 2.85 [1.98;rs738409]   |                  | 0.317   | 0.419   | 0.429   | 0.429   | 0.176   | G=0.1180   | G=0.3502 | G=0.2256    | G=0.484  |
| rs1020689                   | ALMS1P  | 2   | 73900900 | [T/C]   | G           | Silent                    | 0.003   | 2.759 [1.92;rs1020689] |                  | 0.392   | 0.129   | 0.188   | 0.188   | 0.203   | C=0.6180   | C=0.0060 | C=0.2078    | C=0.259  |
| rs2068888                   |         | 10  | 94839642 | [A/G]   | G           |                           | 0.005   | 0.869 [0.8;rs2068888]  |                  | 0.332   | 0.065   | 0.063   | 0.063   | 0.426   | G=0.7428   | G=0.2083 | G=0.5139    | G=0.533  |
| rs6591182                   | EHRP1L1 | 11  | 65349756 | [T/G]   | A           | Missense_V538             | 0.010   | 1.035 [1.0;rs6591182]  |                  | 0.494   | 0.21    | 0.161   | 0.161   | 0.432   | G=0.3101   | G=0.4514 | G=0.5060    | G=0.378  |
|                             |         |     |          |         |             |                           | 1.034   |                        |                  |         |         |         |         |         |            |          |             |          |
|                             |         |     |          |         |             |                           | [1.02 ± |                        |                  |         |         |         |         |         |            |          |             |          |
| rs1532085                   |         | 15  | 58683366 | [A/G]   | G           |                           | 0.014   | 1.047 [rs1532085]      |                  | 0.44    | 0.419   | 0.388   | 0.388   | 0.412   | A=0.5212   | A=0.4940 | A=0.3648    | A=0.379  |
| rs584292                    | TM6SF2  | 19  | 19379549 | [T/C]   | A           | Missense_E167I            | 0.021   | 2.735 [1.8;rs584292]   |                  | 0.491   | 0.032   | 0.116   | 0.116   | 0.5     | T=0.0227   | T=0.0863 | T=0.0676    | T=0.107  |
| rs1088935                   | DOCK7   | 1   | 63118196 | [A/C]   | C           | Silent                    | 0.026   | 2.763 [1.9;rs1088935]  |                  | 0.416   | 0.339   | 0.406   | 0.406   | 0.324   | C=0.3918   | C=0.1766 | C=0.3012    | C=0.344  |
| rs1832007                   | AKR1C4  | 10  | 5254847  | [A/G]   | G           | Silent                    | 0.027   | 0.8627 [0.1;rs1832007] |                  | 0.105   | 0.032   | 0.022   | 0.022   | 0.074   | G=0.0250   | G=0.1111 | G=0.1203    | G=0.202  |
| rs2800                      | SLC9A9  | 3   | 1.43E+08 | [T/C]   | G           | Silent                    | 0.028   | 3.007 [2.0;rs2800]     |                  | 0.437   | 0.016   | 0.018   | 0.018   | 0.432   | C=0.2950   | C=0.5972 | C=0.3400    | C=0.357  |
| rs571312                    |         | 18  | 57839769 | [A/C]   | A           |                           | 0.036   | 1.052 [1.0;rs571312]   |                  | 0.323   | 0.032   | 0.032   | 0.032   | 0.243   | A=0.3691   | A=0.1815 | A=0.2396    | A=0.128  |
| rs3566508                   | CECR5   | 22  | 17625915 | [A/G]   | A           | Missense_T149I            | 0.038   | 2.783 [1.9;rs3566508]  |                  | 0.012   | 0.387   | 0.433   | 0.433   | 0.047   | A=0.0015   | A=0.0000 | A=0.0477    | A=0.029  |
| rs7805747                   | PRKAG2  | 7   | 1.51E+08 | [A/G]   | A           | Silent                    | 0.040   | 2.758 [1.9;rs7805747]  |                  | 0.066   | 0.452   | 0.451   | 0.451   | 0.041   | A=0.3245   | A=0.0030 | A=0.2883    | A=0.173  |
| rs972283                    |         | 7   | 1.30E+08 | [A/G]   | A           |                           | 0.041   | 1.052 [1.0;rs972283]   |                  | 0.377   | 0       | 0.018   | 0.018   | 0.473   | A=0.1233   | A=0.3155 | A=0.4394    | A=0.360  |
| rs1040196                   | SUGP1   | 19  | 19407718 | [T/C]   | G           | Silent                    | 0.043   | 2.72 [1.89;rs1040196]  |                  | 0.162   | 0.306   | 0.379   | 0.379   | 0.095   | C=0.1808   | C=0.1071 | C=0.0706    | C=0.082  |
| rs7703051                   |         | 5   | 74625487 | [A/C]   | C           |                           | 0.044   | 1.053 [1.0;rs7703051]  |                  | 0.41    | 0.258   | 0.299   | 0.299   | 0.345   | C=0.1808   | C=0.1071 | C=0.0706    | C=0.082  |
| rs7121446                   |         | 11  | 1.22E+08 | [A/G]   | A           |                           | 0.044   | 1.047 [1.0;rs7121446]  |                  | 0.249   | 0.242   | 0.188   | 0.188   | 0.189   | A=0.3888   | A=0.0585 | A=0.2416    | A=0.164  |

Suppl. Table 3:

Details of the associated SNPs.
